# Supplementary material for: The Combined Effect of ZnO and CeO2 Nanoparticles on Pisum sativum L.: A Photosynthesis and Nutrients Uptake Study
Source: MDPI journal article supplement (doi:10.3390/cells10113105), 2021-11-10
Supplement: s1 [file s1]

## Supplementary Materials

### **The combined effect of ZnO and CeO<sub>2</sub> nanoparticles on *Pisum sativum* L. A photosynthesis and nutrients uptake study**

Elżbieta Skiba <sup>1,\*</sup>, Monika Pietrzak <sup>1</sup>, Sława Glińska <sup>2</sup> and Wojciech M. Wolf <sup>1</sup>

**Supplementary Table S1:** Characterization of CeO<sub>2</sub> NPs and ZnO NPs

**Supplementary Table S2:** Elements content in certified reference material Oriental Basma Tobacco Leaves - INCT-OBTL-5 ( $\bar{x} \pm ts_{\bar{x}}$ ,  $p = 0.95$ ,  $n = 8$ ).

**Supplementary Table S3:** Root length and tolerance index (TI) of *Pisum sativum* L. treated with nanoparticulate CeO<sub>2</sub> and ZnO. Concentrations of nanomaterials are given in mg/L of elemental zinc or cerium, the cultivation time was 12 days. Distinct letters show the statistically significant differences among treatments as calculated with Tukey's HSD post hoc test. The probability level  $p = 0.95$  was applied.

**Supplementary Figure S1:** Comparison of CO<sub>2</sub> response curves (A/Ci) between control and treated plants. Horizontal reference line is set as the CO<sub>2</sub> compensation point (value of C<sub>i</sub> when A=0).

**Supplementary Table S4:** ANOVA parameters for elements concentrations in roots and shoots of *Pisum sativum* L. plants across all treatments.

**Supplementary Table S5:** Translocation factors (TF) of nutrients from root to shoot in *Pisum sativum* L. plants grown under the sole or combined CeO<sub>2</sub> and ZnO NPs treatments. Concentrations of nanoparticles are given in mg/L of elemental cerium or zinc, respectively. The cultivation time was 12 days.

**Table S1.** Characterization of CeO<sub>2</sub> NPs and ZnO NPs [52,54]

| Property                       | CeO <sub>2</sub> NPs                                                              | ZnO NPs                                                                             |
|--------------------------------|-----------------------------------------------------------------------------------|-------------------------------------------------------------------------------------|
| TEM images                     | 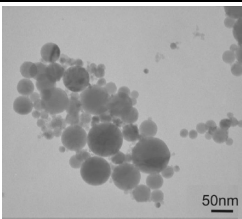 |  |
| TEM average particle size (nm) | 26 ± 14                                                                           | 51 ± 18                                                                             |
| Zeta potential (mV)            | -41.55 ± 1.13                                                                     | -3.30 ± 0.29                                                                        |

**Table S2.** Elements content in certified reference materials Oriental Basma Tobacco Leaves - INCT-OBTL-5 ( $\bar{x} \pm ts_{\bar{x}}$ ,  $p = 0.95$ ,  $n = 8$ ).

| Element | Certified value | Determined content | Recovery [%] |
|---------|-----------------|--------------------|--------------|
|         | [wt %]          |                    |              |
| Ca      | 3.996 ± 0.142   | 3.976 ± 0.429      | 99           |
| K       | 2.271 ± 0.076   | 2.175 ± 0.139      | 96           |
| Mg      | 0.853 ± 0.034   | 0.832 ± 0.076      | 97           |
| Fe*     | 0.149           | 0.144 ± 0.009      | 97           |
|         | [mg/kg]         |                    |              |
| Ce      | 2.99 ± 0.18     | 2.86 ± 0.24        | 96           |
| Cu      | 10.1 ± 0.4      | 10.9 ± 0.1         | 108          |
| Mn      | 180 ± 6         | 174 ± 2            | 97           |
| Zn      | 52.4 ± 1.8      | 51.3 ± 1.1         | 98           |

\* information value

**Table S3.** Root length and tolerance index (TI) of *Pisum sativum* L. treated with nanoparticulate CeO<sub>2</sub> and ZnO. Concentrations of nanomaterials are given in mg/L of elemental zinc or cerium, the cultivation time was 12 days. Distinct letters show the statistically significant differences among treatments as calculated with Tukey's HSD post hoc test. The probability level  $p = 0.95$  was applied.

| Treatment       | Root length<br>(mm) | TI   |
|-----------------|---------------------|------|
| Control         | 174 ± 9 a           | 1.00 |
| Ce 100          | 133 ± 10 c          | 0.76 |
| Ce 200          | 118 ± 7 d           | 0.68 |
| Zn 100          | 167 ± 15 a          | 0.93 |
| Zn 200          | 154 ± 4 b           | 0.89 |
| Ce 100 + Zn 100 | 138 ± 6 c           | 0.79 |
| Ce 200 + Zn 200 | 118 ± 7 d           | 0.68 |

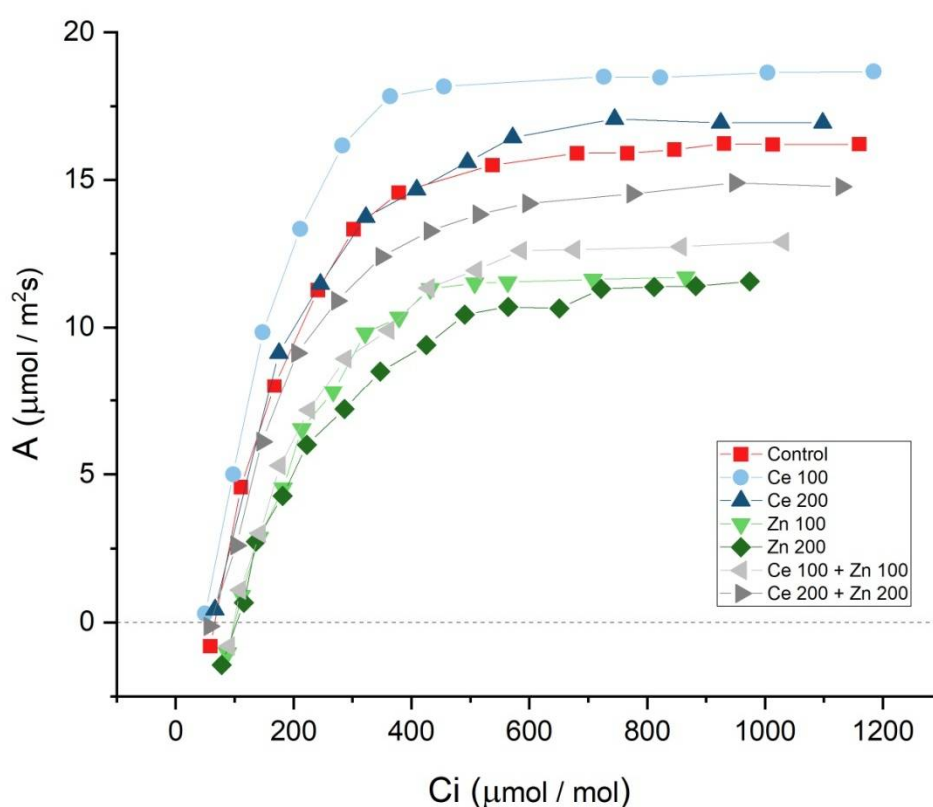

**Figure S1.** Comparison of CO<sub>2</sub> response curves ( $A/C_i$ ) between control and treated plants. Horizontal reference line is set as the CO<sub>2</sub> compensation point (value of  $C_i$  when  $A=0$ ).

**Table S4.** Translocation factors (TF) of nutrients in *Pisum sativum* L. plants grown under the sole or combined CeO<sub>2</sub> and ZnO NPs treatments. Concentrations of nanoparticles are given in mg/L of elemental cerium or zinc, respectively. The cultivation time was 12 days.

| Treatment       | Translocation factor [-] |                  |                  |                  |                  |                 |
|-----------------|--------------------------|------------------|------------------|------------------|------------------|-----------------|
|                 | TF <sub>Cu</sub>         | TF <sub>Mn</sub> | TF <sub>Fe</sub> | TF <sub>Mg</sub> | TF <sub>Ca</sub> | TF <sub>K</sub> |
| Control         | 0.81                     | 0.36             | 0.36             | 1.64             | 4.18             | 0.71            |
| Ce 100          | 0.89                     | 0.31             | 0.56             | 1.75             | 3.47             | 0.74            |
| Ce 200          | 0.95                     | 0.38             | 0.54             | 1.90             | 3.10             | 0.73            |
| Zn 100          | 0.57                     | 1.79             | 0.21             | 1.47             | 2.79             | 1.12            |
| Zn 200          | 0.60                     | 1.63             | 0.14             | 2.22             | 2.00             | 1.23            |
| Ce 100 + Zn 100 | 0.72                     | 1.61             | 0.19             | 2.18             | 1.91             | 1.27            |
| Ce 200 + Zn 200 | 0.80                     | 1.64             | 0.09             | 2.24             | 2.63             | 1.24            |

**Table S5.** ANOVA parameters for elements concentrations in roots and shoots of *Pisum sativum* L. plants across all treatments.

| Element | SS <sub>total</sub> | MS <sub>between</sub> | MS <sub>within</sub> | F        | p-value  | Test F |
|---------|---------------------|-----------------------|----------------------|----------|----------|--------|
| Root    |                     |                       |                      |          |          |        |
| Cu      | 292.0678            | 46.97811              | 0.318725             | 147.3939 | 7.00E-22 | 2.399  |
| Mn      | 44226.91            | 7321.972              | 11.34898             | 645.1659 | 5.38E-27 | 2.474  |
| Fe      | 1794.055            | 286.9953              | 2.669745             | 107.4991 | 1.48E-17 | 2.790  |
| Mg      | 8573500             | 1407852               | 4860.972             | 289.6236 | 1.59E-22 | 2.474  |
| Ca      | 39630315            | 5975744               | 164167.4             | 36.40031 | 1.27E-10 | 2.528  |
| K       | 7.74E+09            | 1.29E+09              | 1161359              | 1107.269 | 3.89E-24 | 2.599  |
| Shoot   |                     |                       |                      |          |          |        |
| Cu      | 18.60384            | 2.55977               | 0.124816             | 20.50828 | 1.02E-08 | 2.474  |
| Mn      | 1794.055            | 286.9953              | 2.669745             | 107.4991 | 1.48E-17 | 2.459  |
| Fe      | 21684.22            | 3581.753              | 12.10654             | 295.8527 | 1.80E-15 | 2.741  |
| Mg      | 9922856             | 1593113               | 14006.88             | 113.7379 | 2.15E-17 | 2.474  |
| Ca      | 1,3E+08             | 20621713              | 246230.9             | 83.74949 | 6.72E-15 | 2.508  |
| K       | 5.74E+08            | 90264489              | 1413548              | 63.85671 | 3.47E-13 | 2.528  |
